# Supplementary material for: Organizing ISU Nordic development project 2010-2011
Source: Royal Society of Chemistry journal article supplement (doi:10.1039/c8cc07423b), 2012-01-01
Supplement: c8cc07423b1.pdf [file c8cc07423b1.pdf]

## Visible transparent white light emitting ink from Ce<sup>3+</sup> sensitized monodispersed Tb, Sm co-doped LaF<sub>3</sub>@C-dots nanocomposite

Sirshendu Ghosh, Chandrani Pal, Sumana Paul, Manas Saha, Dulal Barman and Subodh Kumar De\*

Email: msskd@iacs.res.in

### Experimental Section

#### Materials:

Lanthanum Nitrate hexahydrate [ La(NO<sub>3</sub>)<sub>3</sub>. 6H<sub>2</sub>O, 99.99%], , Samarium Nitrate hexahydrate [ Sm(NO<sub>3</sub>)<sub>3</sub>. 6H<sub>2</sub>O, 99.9%], cerium nitrate hexahydrate [ Ce(NO<sub>3</sub>)<sub>3</sub>, 6H<sub>2</sub>O], Terbium chloride [ TbCl<sub>3</sub>, anhydrous, 99.9%], Oleic acid [OLAH, 99%], Sodium oleate [ Na-OL, 99%], Ammonium fluoride [ NH<sub>4</sub>F], Ethanol Amine [98%], Tetraethyl ortho silicate [TEOS], (3-Aminopropyl)triethoxysilane [APTES], IGEPAL CO-520, Poly(methyl methacrylate) (PMMA) were purchased from Sigma-Aldrich. Sodium Hydroxide, Methanol, Ethanol, , hexane and other solvents were purchased from Merck India.

#### *Synthesis of doped LaF<sub>3</sub> Nanocrystals:*

Monodispersed doped LaF<sub>3</sub> NCs were synthesized by thermal decomposition of mixed metal oleate in presence of fluoride source. For mixed metal oleate synthesis, x mmole Sm(NO<sub>3</sub>)<sub>3</sub>.6H<sub>2</sub>O, y mmole TbCl<sub>3</sub>, z mmole Ce(NO<sub>3</sub>)<sub>3</sub>.6H<sub>2</sub>O and {1-(x+y+z)} mmole La(NO<sub>3</sub>)<sub>3</sub>.6H<sub>2</sub>O were mixed with 3.5 mmole of NaOL in mixed solvent of 3 ml EtOH, 3 ml H<sub>2</sub>O and 8 ml hexane and heated to 75 °C for 5 hrs in refluxed condition. The mixed oleate was washed with DI H<sub>2</sub>O to remove NaNO<sub>3</sub> and NaCl.

The mixed oleate was dissolved in 14 ml of octadecene, 5 ml of OLAH and stirred vigorously at 80°C for 30 min to remove hexane and to obtain a transparent clear homogenous solution. The solution was cooled down to room temperature. 3 mmol NH<sub>4</sub>F, 1 mmol NaOH dissolved in 5 ml MeOH was added drop wise (slowly) to mixed oleate solution. The overall mixture was stirred at

RT for 1 hr. Again the solution was heated to 80°C for 30 min to remove dissolved MeOH to obtain a bright transparent yellow colour solution. The solution was again heated to 110°C under dynamic evacuation to remove trace amount of water. The mixture was further heated to 305 °C for 80 min in presence of N<sub>2</sub> atmosphere. The nanocrystals were precipitated with addition of acetone as nonsolvent. The washing process was carried out for 3-4 times to remove excess oleic acid. Finally the product was dissolved in hexane and stored for further use.

**LaF<sub>3</sub>@d-SiO<sub>2</sub> synthesis:** dense silica (SiO<sub>2</sub>) layer has been deposited over the surface of LaF<sub>3</sub> NCs by modified stober process to make the NC water soluble and C-dot decoration. Doped LaF<sub>3</sub> NCs was dissolved in 12 ml of hexane to get a solution of 5000 mg/L. The solution was sonicated and 100 µl of IGEPAL CO-520 was added dropwise. Again 400 µl of IGEPAL CO-520 was added slowly under vigorous stirring. 100 µl of NH<sub>3</sub> (25% V/V) was added into the solution and sonicated for 30 min. Afterthat 100 µl of TEOS was added and stirred for overnight. LaF<sub>3</sub>@d-SiO<sub>2</sub> NCs was precipitated by addition of 2 ml acetone. The product was washed with 80% ethanol 3-4 times. The as-obtained NCs were stored in ethanol for further use.

**APTES modification of d-SiO<sub>2</sub>@LaF<sub>3</sub>:** The surface of NC was further functionalised with APTES to obtain positive charge on NC surface. 1000 mg/L of d-SiO<sub>2</sub>@LaF<sub>3</sub> was dissolved in 10 ml of EtOH and sonicated for 1 min. Desired amount of APTES was added to the solution and further sonicated for 10 min. The mixture was stirred for 15 hr. The product was washed with EtOH and kept in EtOH for further use.

#### **C-dots synthesis:**

N doped C-dot was synthesized by thermal decomposition of amine in presence of oxidising agent. 3 ml of ethanolamine and 4.5 ml of H<sub>2</sub>O<sub>2</sub> were taken in a round bottom flask fitted with condenser. The temperature of solution was raised to 200° C with a ramp rate of 2°C/min. The solution was kept at this temperature for 1 hr in N<sub>2</sub> atmosphere. The product was dissolved in 100 ml ethanol/H<sub>2</sub>O for further use.

#### **Synthesis of C-dots decorated d-SiO<sub>2</sub>@LaF<sub>3</sub> nanocomposite:**

White light emitting nanocomposites was synthesized by decorating N doped C-dots onto the d-SiO<sub>2</sub> coated LaF<sub>3</sub> NCs surface. In a typical synthesis, 5000 mg/ L of APTES modified d-SiO<sub>2</sub>@doped LaF<sub>3</sub> NCs was dissolved in 5 ml of DI water. Then 500 µl of N doped C-dots solution in DI H<sub>2</sub>O (Crude C-dots solution was diluted with 100 ml of H<sub>2</sub>O) was added and stirred over night. The final product was washed with Ethanol and H<sub>2</sub>O to remove free C-dots form nanocomposite. The product was stored in DI H<sub>2</sub>O/EtOH for further use and LED fabrication.

### **Characterisation:**

The crystalline phases of the products were determined by X-ray powder diffraction (XRD) using a Bruker AXS D8SWAX diffractometer, with Cu K $\alpha$  radiation ( $\lambda = 1.54 \text{ \AA}$ ), employing a scanning rate of  $0.5^\circ \text{ S}^{-1}$  in the  $2\theta$  range from  $10^\circ$  to  $80^\circ$ . Transmission electron microscopy (TEM) images and high angle annular dark field scanning TEM (HAADF-STEM) images were taken using an ultrahigh resolution field emission gun transmission electron microscope (UHR-FEG TEM, JEM-2100F, Jeol, Japan) operating at 200 kV. For the TEM observations, the sample was dissolved in hexane/EtOH and was drop cast on a carbon-coated copper grid. Room-temperature photoluminescence (PL) measurements were carried out with a fluorescence spectrometer (Hitachi, F-2500). Fourier transform infrared (FT-IR) spectra of the samples were taken by using a Perkin Elmer Spectrochem 100 FT-IR Spectrometer.

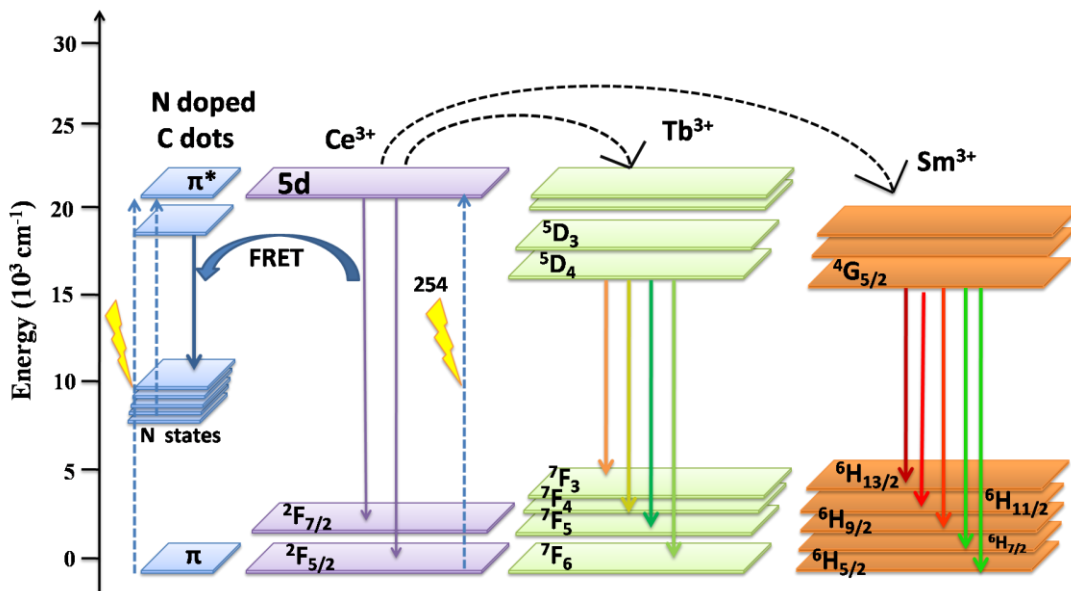

**Scheme-I:** Schematic diagram of the possible mechanism for the energy transfer from Ce<sup>3+</sup> to Tb<sup>3+</sup>, Sm<sup>3+</sup> and C-dots in nanocomposite.

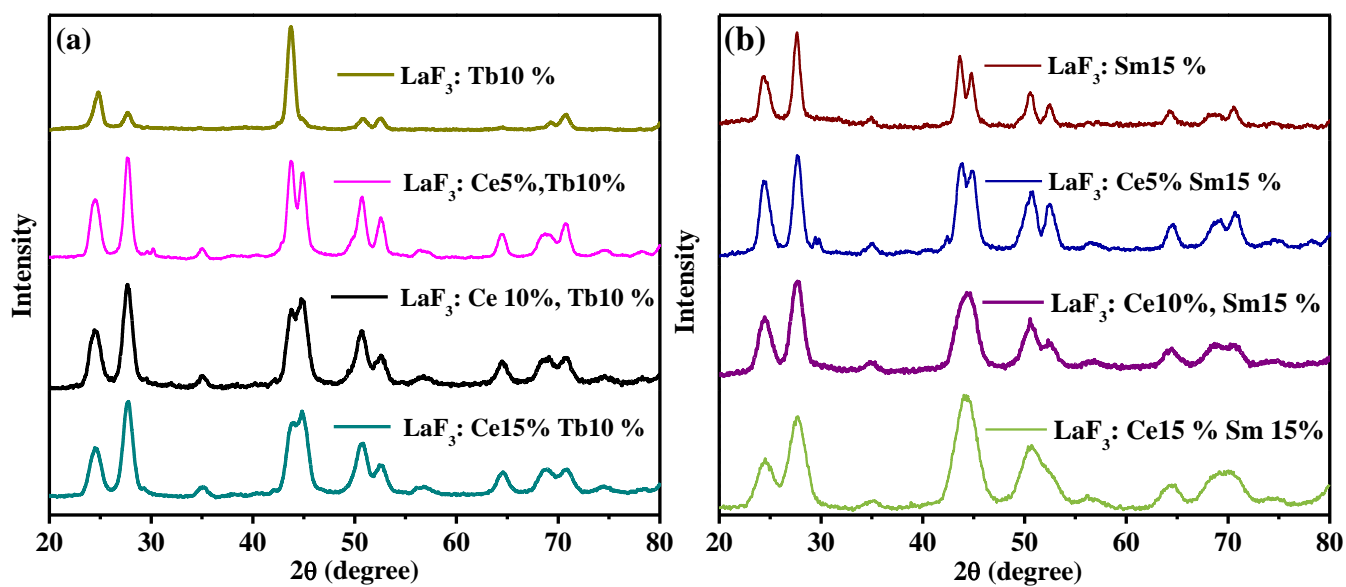

**Fig. S1:** (a) XRD pattern of Tb doped and Ce, Tb co-doped  $\text{LaF}_3$  nanocrystals. (b) XRD pattern of Sm and Ce, Sm doped  $\text{LaF}_3$  nanocrystals. All of the nanoparticles were found to be in pure hexagonal phase and matched well with COD: 9009994.

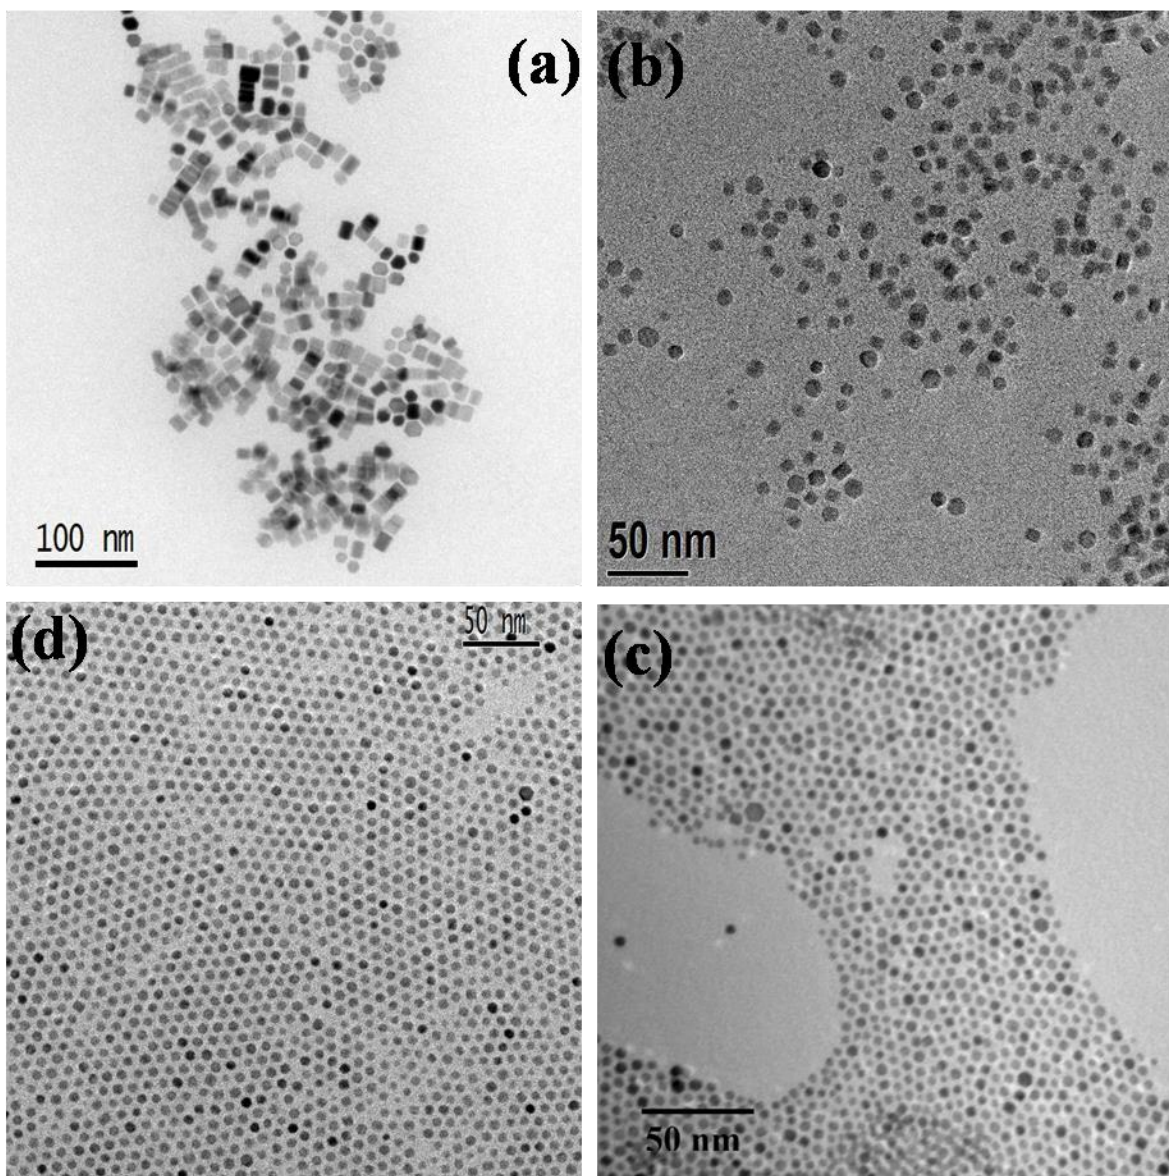

**Fig. S2:** TEM image of (a) 5%, (b) 10%, (c) 15% and (d) 20% Tb doped LaF<sub>3</sub> nanocrystals. The size of nanocrystals is found to decrease from  $14 \pm 3$  nm to  $8 \pm 2$  nm.

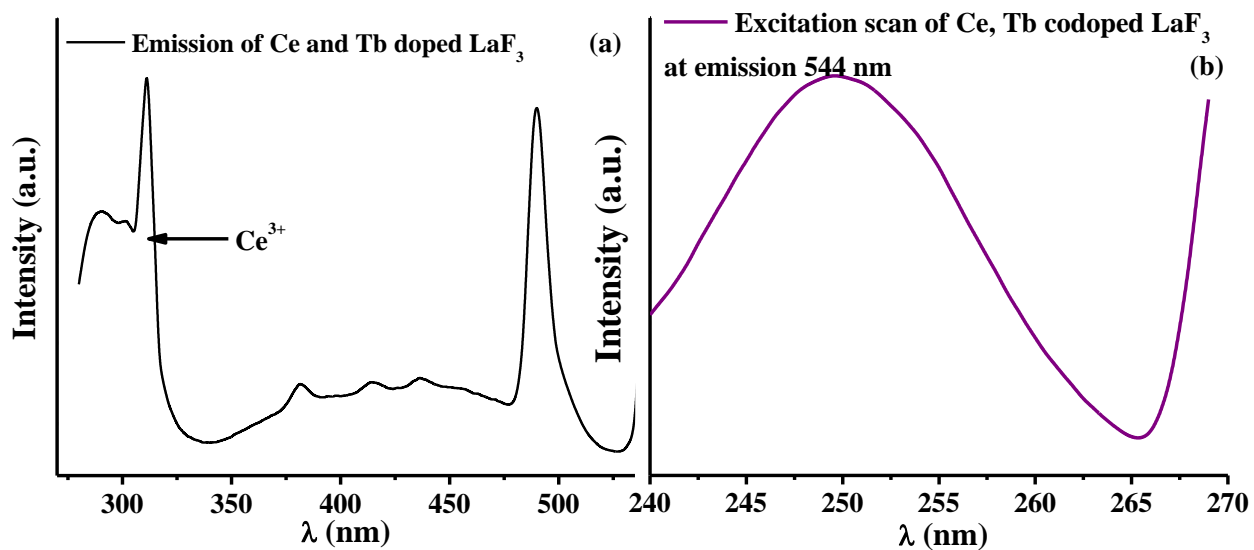

**Fig. S3:** (a) Emission spectra of Ce (15%) and Tb (10%) co-doped LaF<sub>3</sub> nanocrystals. New emission profile has been observed in 290 to 330 nm region along with characterized peaks of Tb<sup>3+</sup>. (b) Excitation scan of Ce and Tb co-doped LaF<sub>3</sub> nanocrystals at emission of wavelength 544 nm.





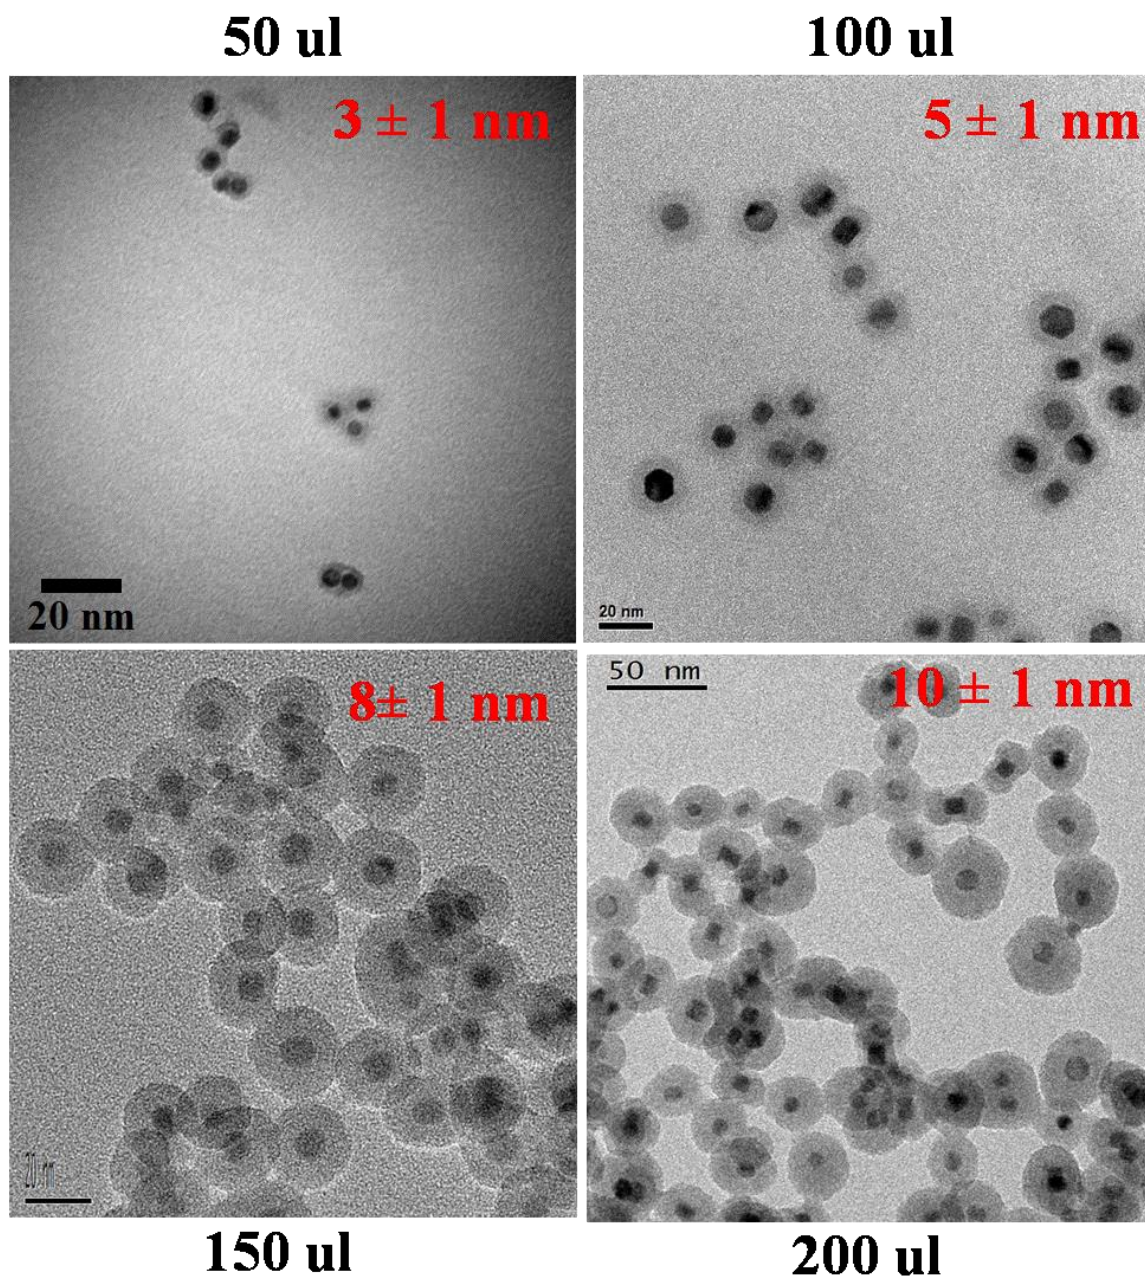

**Fig. S4:** TEM image of d-SiO<sub>2</sub> coated doped LaF<sub>3</sub> nanocrystals with varying thickness. Thickness was varied from 3 nm to 11 nm .

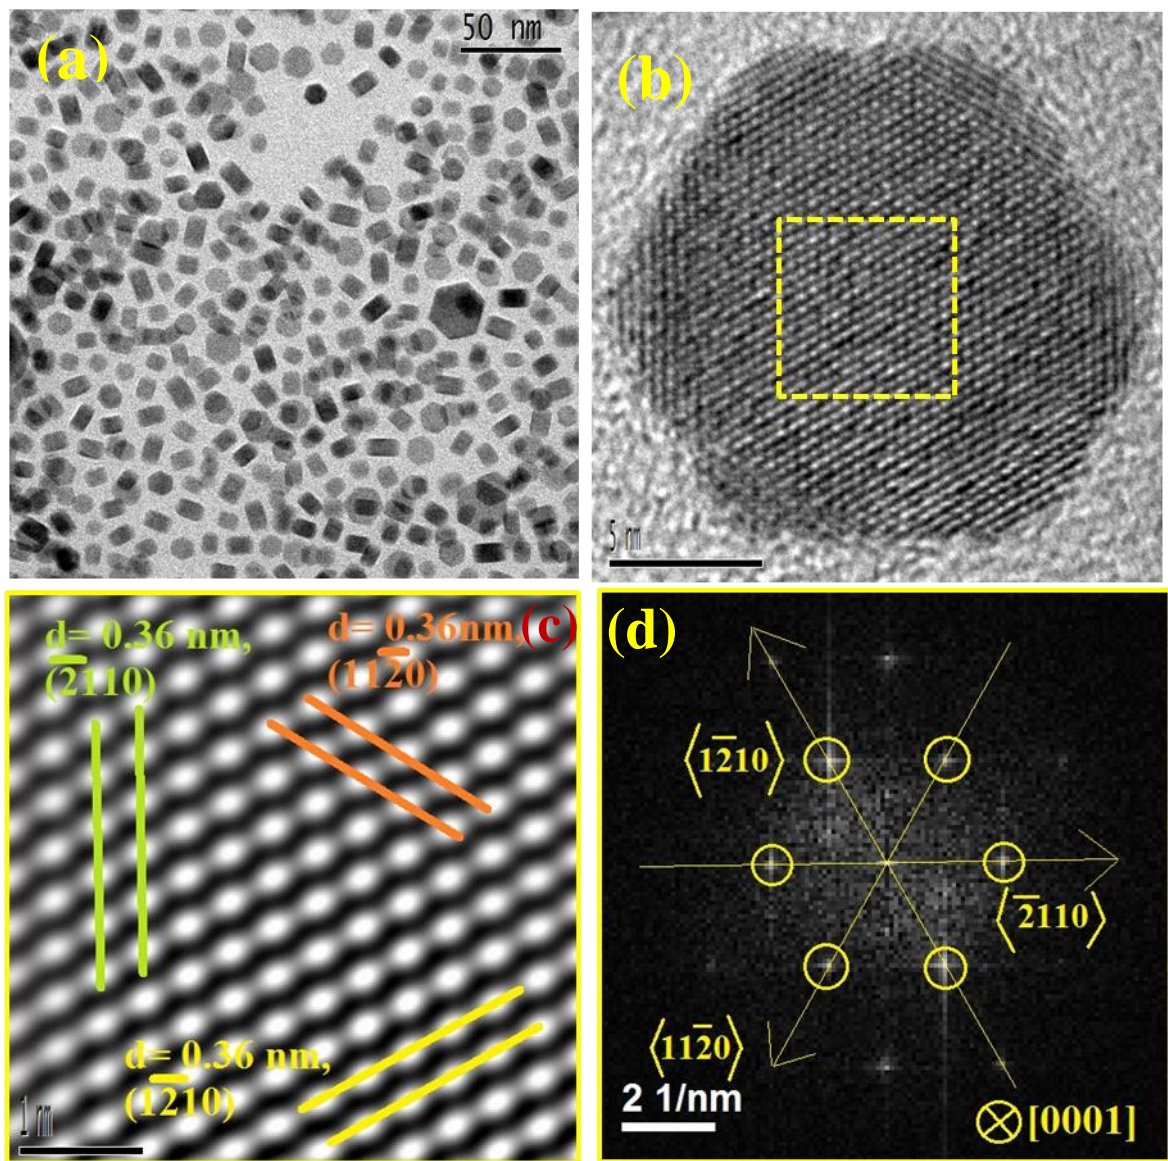

**Fig. S5:** (a) Large area TEM image of Ce, Tb and Sm doped  $\text{LaF}_3$  nanocrystals. (b) HRTEM image of a single nanocrystal showing single crystalline nature of particle. (c) Reconstructed HRTEM image and (d) corresponding FFT pattern.

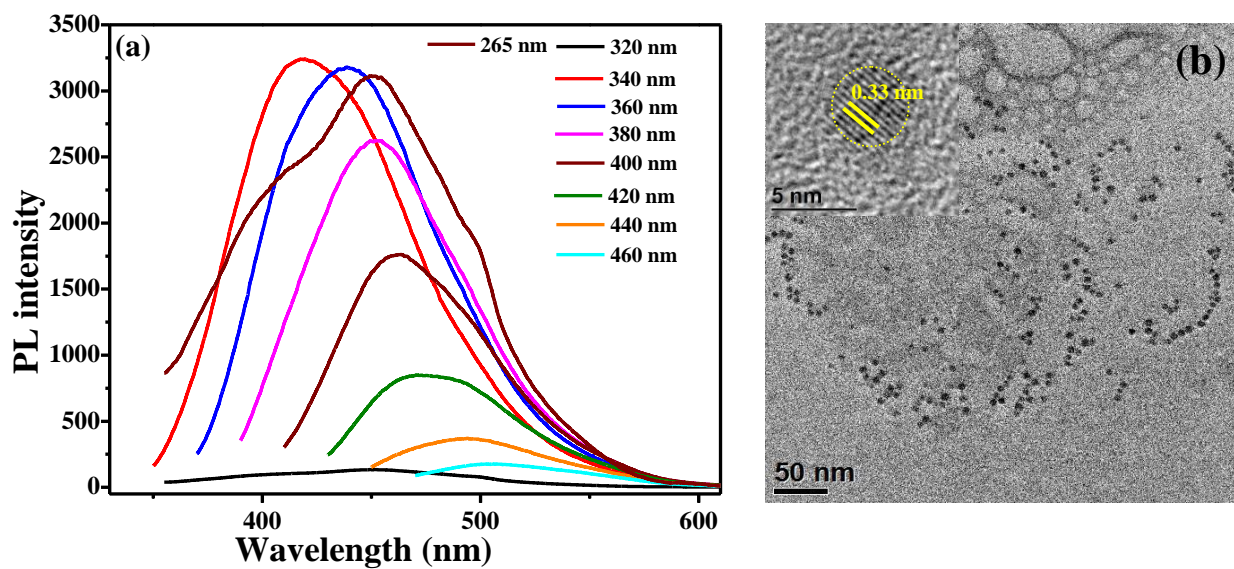

**Fig. S6:** (a) Excitation dependent emission profile of N doped C-dots. (b) TEM image of C-dots. Inset shows the HRTEM image of C-dot.

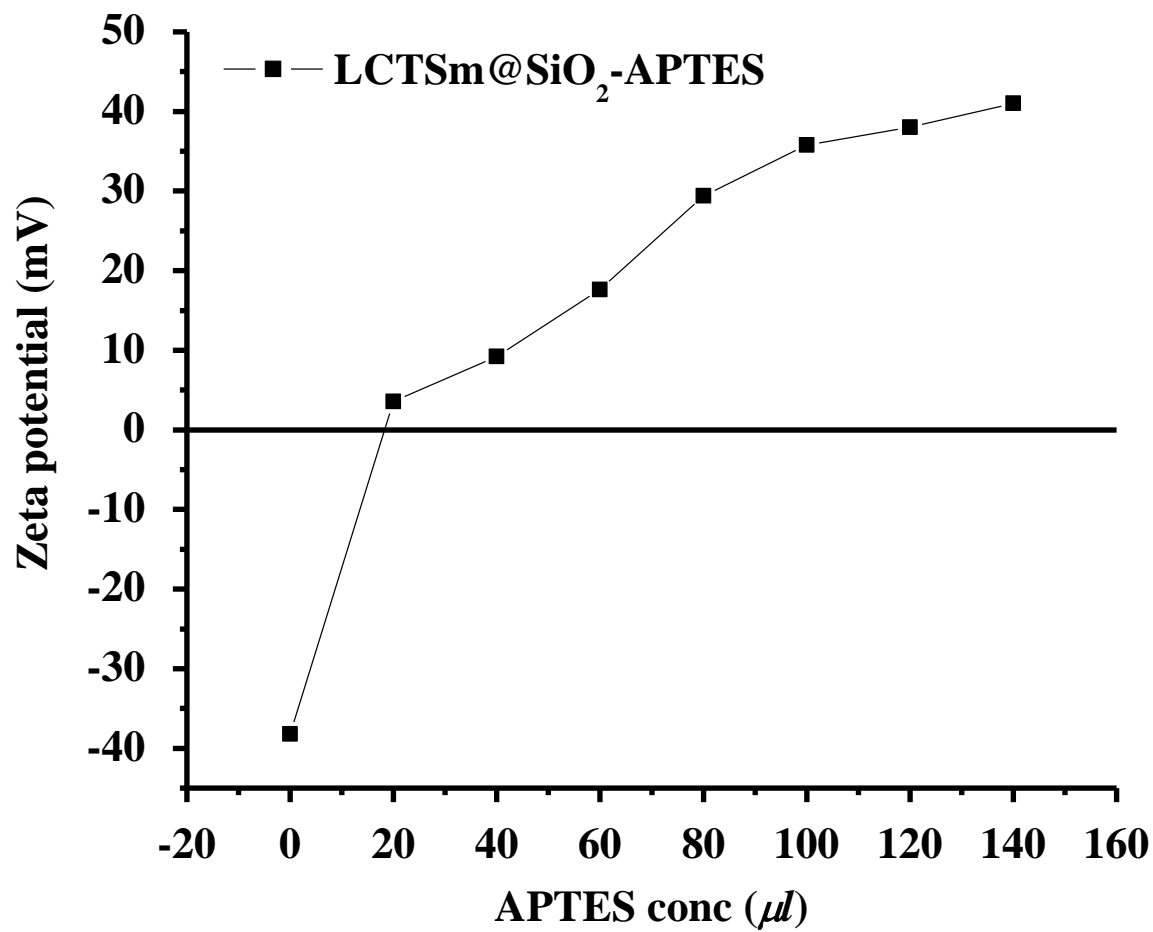

**Fig. S7:** Change of zeta potential of d-SiO<sub>2</sub> coated nanoparticles with APTES anchoring.

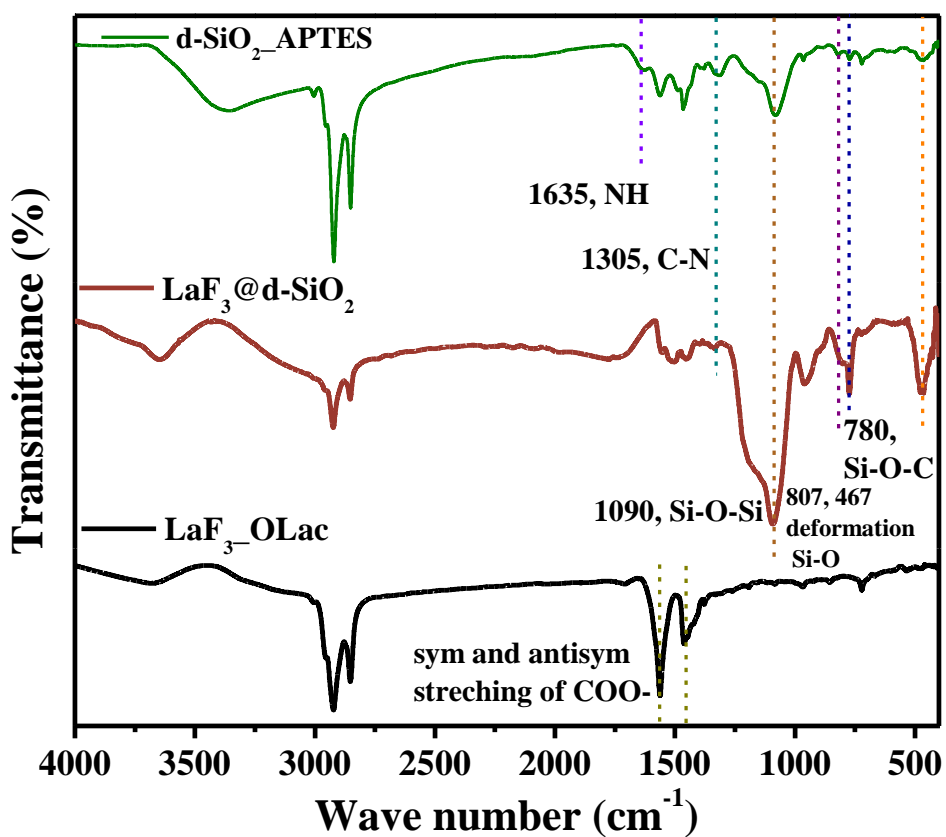

**Fig. S8:** FTIR spectra of as synthesized oleic acid capped LaF<sub>3</sub> nanoparticles. Symmetric and antisymmetric stretching modes of COO<sup>-</sup> were observed for oleate capping agent. d-SiO<sub>2</sub> coated nanoparticles shows characteristic Si-O-C and Si-O-Si stretching. APTES modified SiO<sub>2</sub> shows the appearance of stretching frequencies related to C-N and N-H of amine functional group along with the characteristics feature of SiO<sub>2</sub>.

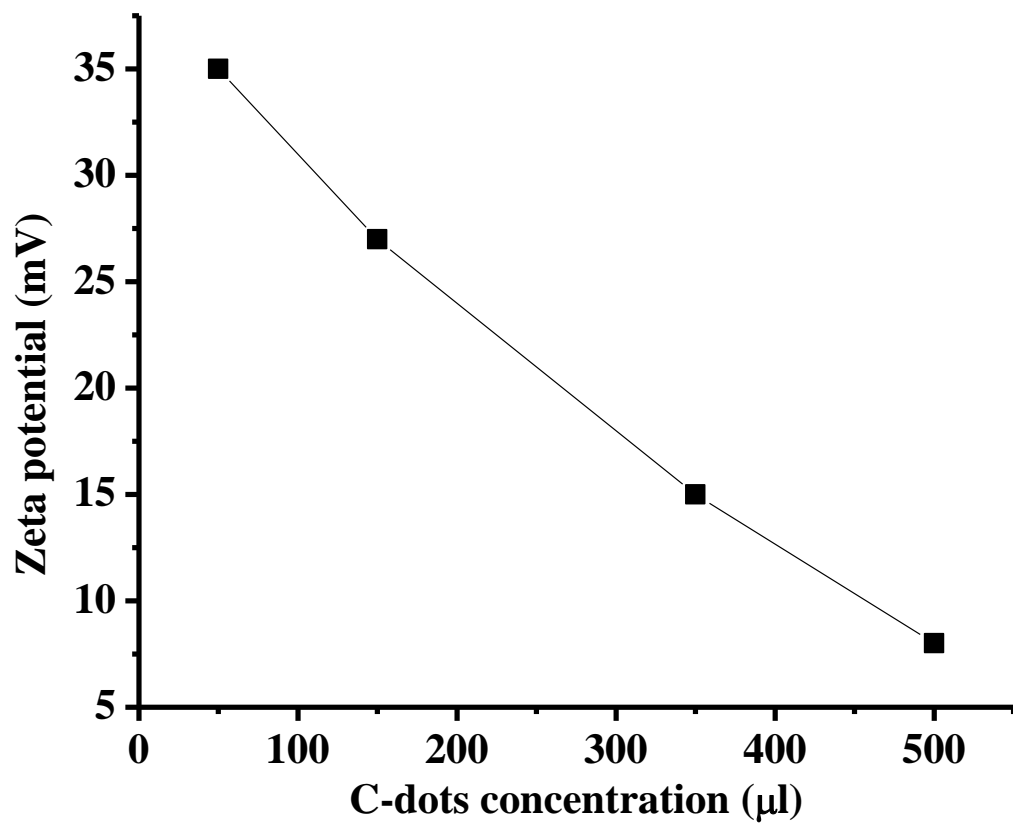

**Fig. S9:** Change of zeta potential of white light emitting nanocomposite with C-dots variation.

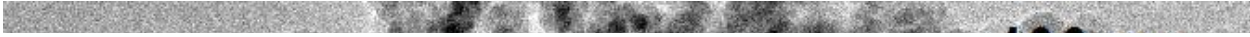

**Fig. S10:** Large area TEM image of d-SiO<sub>2</sub>@Ce,Tb,Sm:LaF<sub>3</sub> nanocrystals before C-dots decoration.

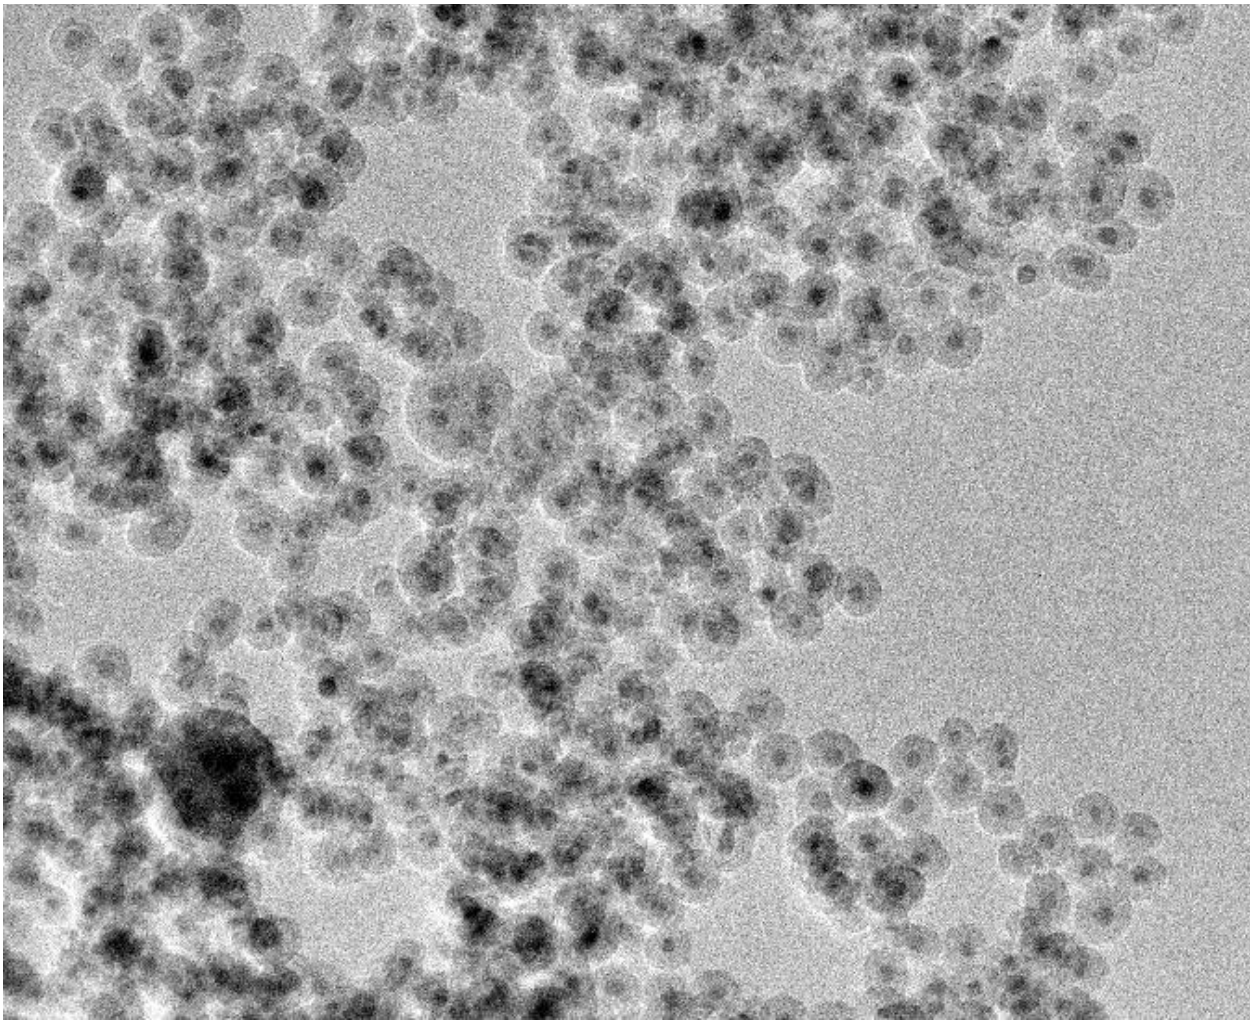

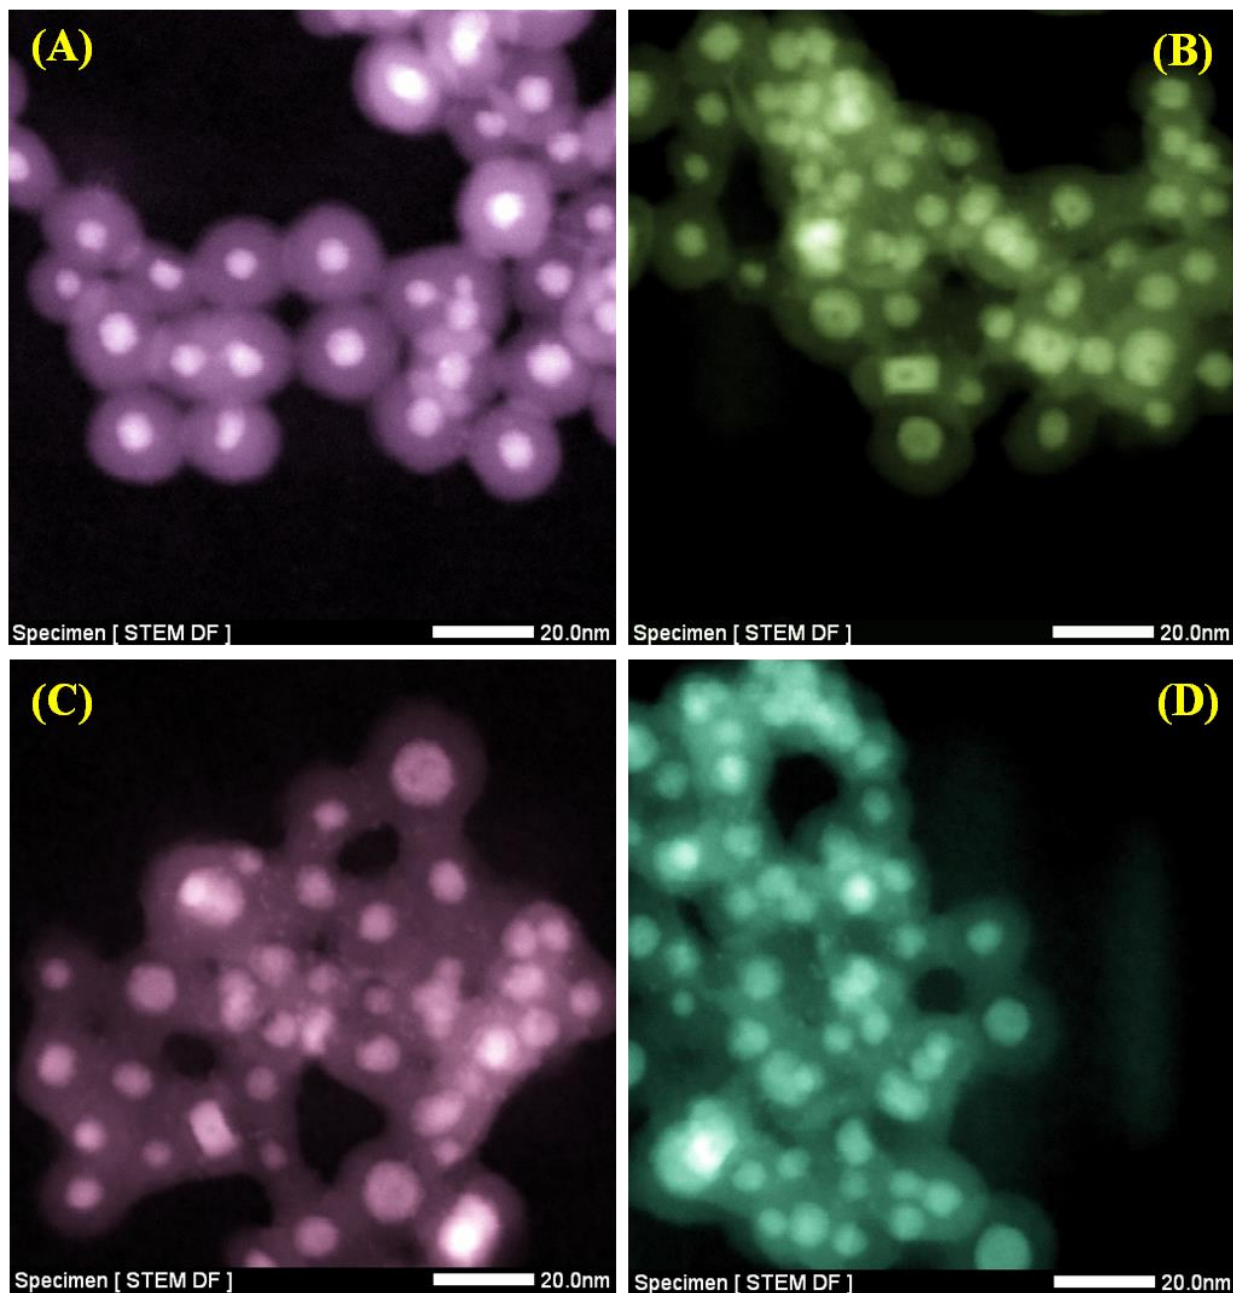

**Fig. S11:** STEM-DARK Field image of C-dots decorated d-SiO<sub>2</sub> coated doped LaF<sub>3</sub> nanocomposites with varying C-dots concentration.



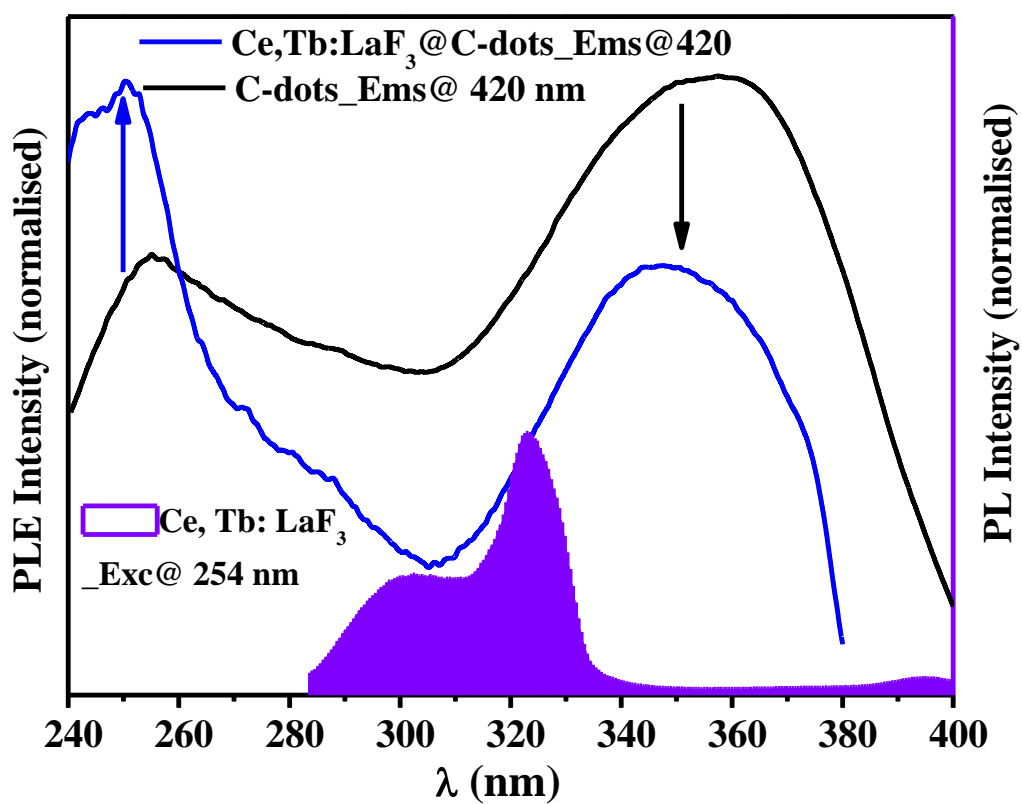

**Fig. S12:** Excitation profile of N doped C-dots and C dots decorated doped (Ce, Tb, Sm ) LaF<sub>3</sub> nanocrystals at emission wavelength 420 nm. Filled graph area is the emission profile for Ce<sup>3+</sup> ions with 254 nm excitation.

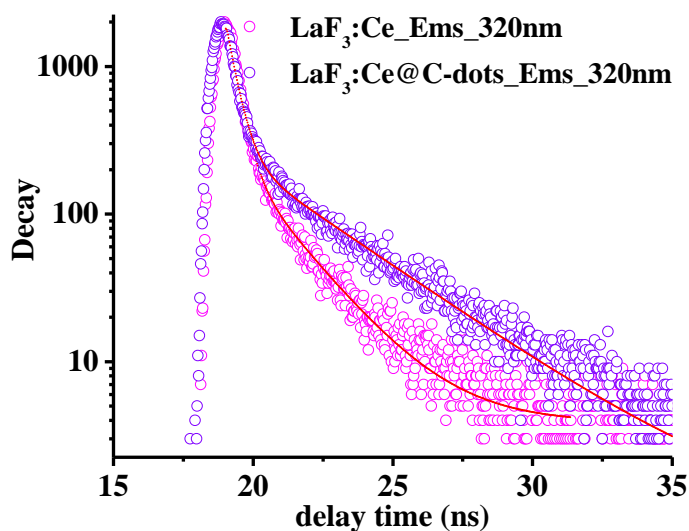

**Fig. S13: PL decays of LaF<sub>3</sub>: Ce and LaF<sub>3</sub>:Ce@C-dots nanoparticles.**

**Table S1 PL decay components of LaF<sub>3</sub>:Ce and LaF<sub>3</sub>:Ce@C-dots nanoparticles:**

| Samples                      | Emission wavelength (nm) | Decay life times (ns)                          | Contributions (%)                                | Average decay time (ns) |
|------------------------------|--------------------------|------------------------------------------------|--------------------------------------------------|-------------------------|
| LaF <sub>3</sub> :Ce         | 320                      | t <sub>1</sub> = 0.32<br>t <sub>2</sub> = 1.84 | f <sub>1</sub> = 0.74<br>f <sub>2</sub> = 0.25   | t <sub>av</sub> = 0.70  |
| LaF <sub>3</sub> :Ce@ C-dots | 320                      | t <sub>1</sub> = 0.36<br>t <sub>2</sub> = 3.35 | f <sub>1</sub> = 0.92<br>f <sub>2</sub> = 0.0759 | t <sub>av</sub> = 0.587 |

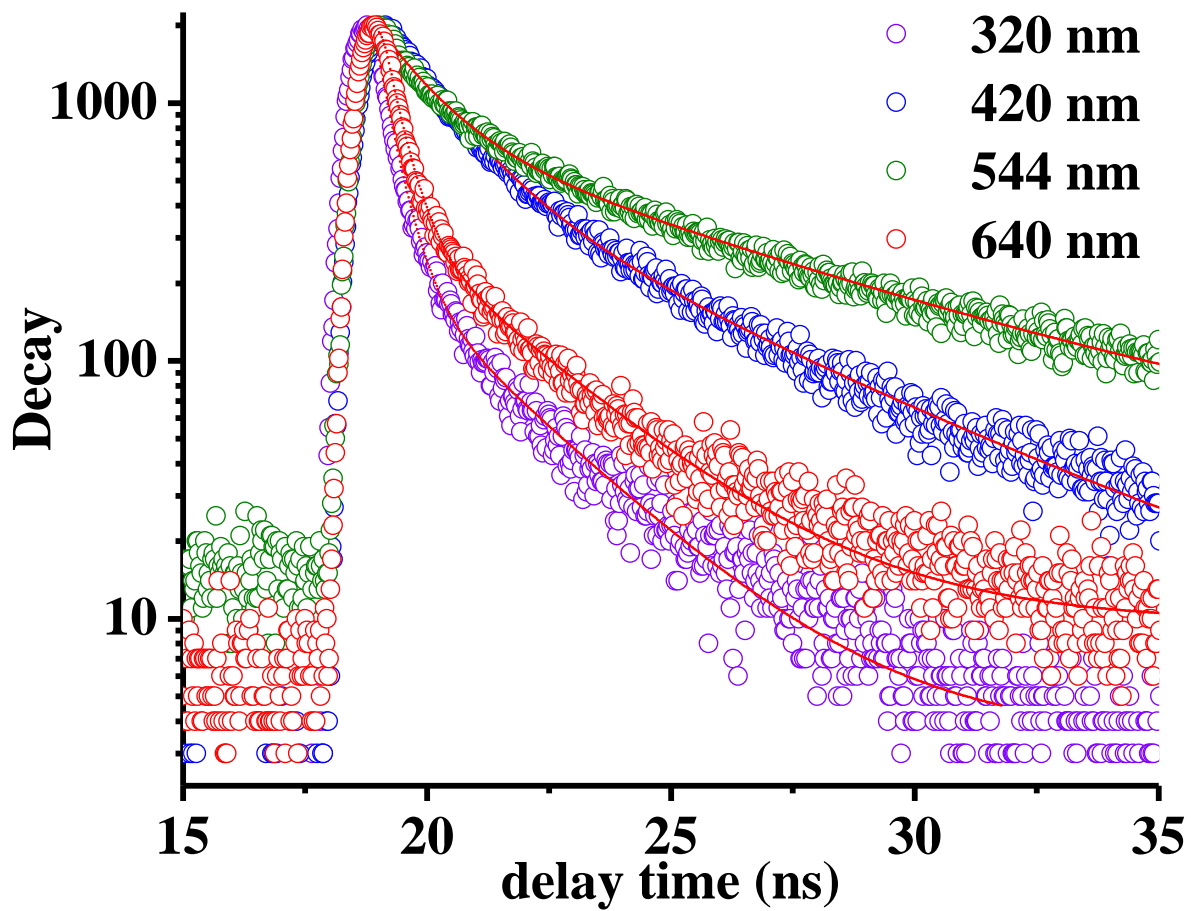

Fig. S14: PL decays of LaF<sub>3</sub>: Ce and LaF<sub>3</sub>:Ce, Tb, Sm@C-dots white light emitting nanocomposite.

**Table S2 PL decay components of LaF<sub>3</sub>:Ce,Tb, Sm@C-dots nanoparticles:**

| <b>Samples</b>                        | <b>Emission wavelength (nm)</b> | <b>Decay life times (ns)</b>                   | <b>Contributions (%)</b>                        | <b>Average decay time (ns)</b> |
|---------------------------------------|---------------------------------|------------------------------------------------|-------------------------------------------------|--------------------------------|
| LaF <sub>3</sub> :Ce,Tb,Sm@<br>C-dots | 420                             | t <sub>1</sub> = 1.3<br>t <sub>2</sub> = 4.92  | f <sub>1</sub> = 0.47<br>f <sub>2</sub> = 0.529 | 3.21                           |
|                                       | 544                             | t <sub>1</sub> = 1.12<br>t <sub>2</sub> = 6.57 | f <sub>1</sub> = 0.29<br>f <sub>2</sub> = 0.701 | 4.94                           |
|                                       | 640                             | t <sub>1</sub> = 0.38<br>t <sub>2</sub> = 2.63 | f <sub>1</sub> = 0.57<br>f <sub>2</sub> = 0.427 | 1.34                           |
